# Supplementary material for: Probing the effect of substituents and solvent on [Mn(R-sal-N-1,5,8,12)]BPh4: a systematic investigation of SCO properties
Source: Royal Society of Chemistry journal article supplement (doi:10.1039/d3nj03277a), 2023-12-20
Supplement: d3nj03277a1.pdf [file d3nj03277a1.pdf]

# Probing the Effect of Substituents and Solvent on [Mn(R-sal-N-1,5,8,12)]BPh<sub>4</sub>: A Systematic Investigation of SCO Properties

Chun-Yan Qin<sup>a,b</sup>•Sen-Yu Zhang<sup>a</sup>•Hua-wei Zhou<sup>a</sup>•Hao-Ze Zhang<sup>a</sup>•sheng-Ze Zhao<sup>a</sup>•Yong-Hua Li<sup>a\*</sup>•Chao Tang<sup>b\*</sup>•Shi Wang<sup>a\*</sup>

<sup>a</sup> State Key Laboratory of Organic Electronics and Information Displays & Institute of Advanced Materials (IAM), Nanjing University of Posts & Telecommunications, 9 Wenyuan Road, Nanjing 210023, China.

<sup>b</sup> Key Laboratory of Fine Chemical Application Technology, Sichuan Vocational College of Chemical Technology, 733 Huguo Road, Luzhou 646300, China.

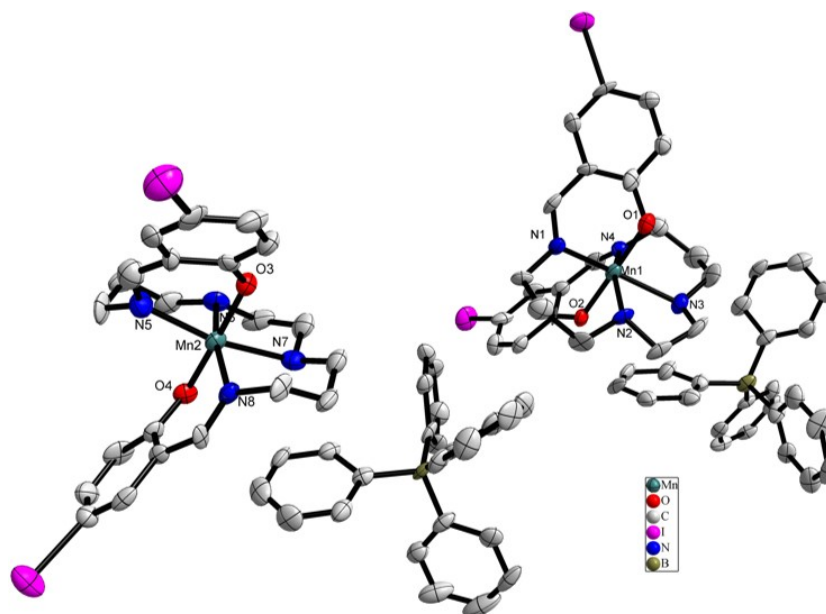

**Figure S1.** Asymmetric unit of complex **1**, measured at 100 K and hydrogen atoms have been omitted for clarity. Ellipsoids at 50% probability.

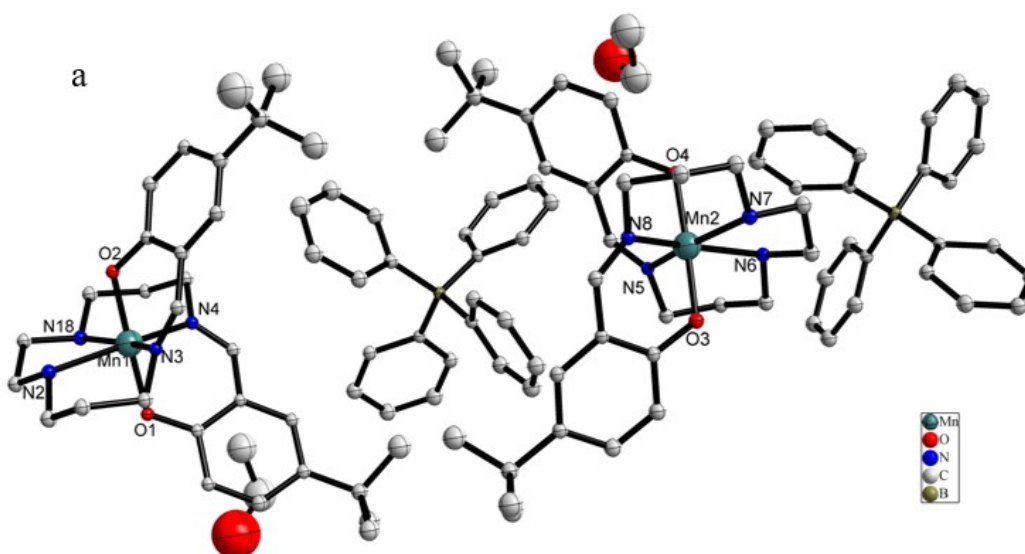

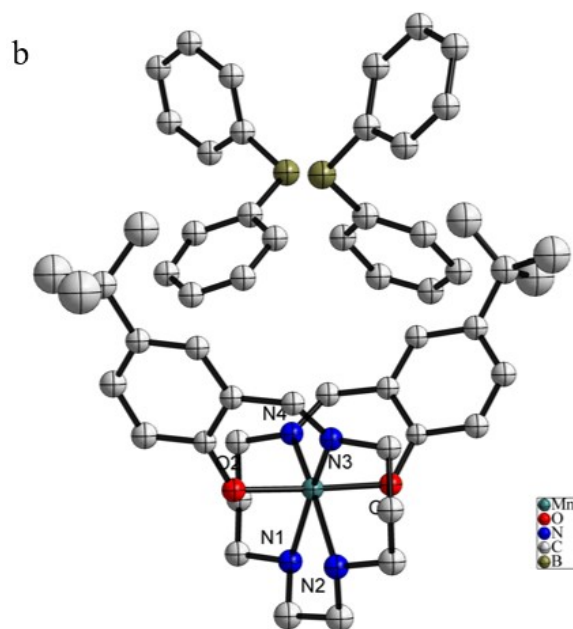

**Figure S2.** Asymmetric unit of complex **2**, measured at 110 K (a) and 298 K (b), the hydrogen atoms have been omitted for clarity. Ellipsoids at 50% probability.

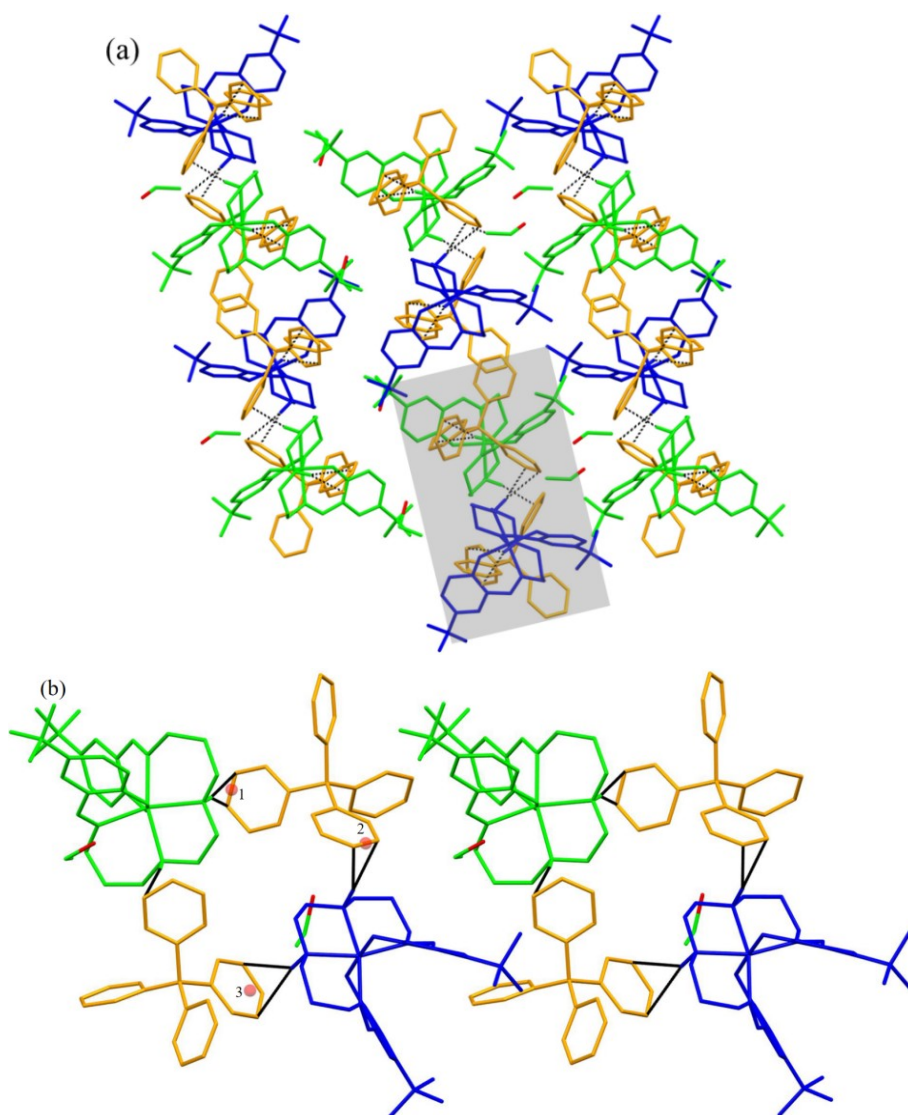

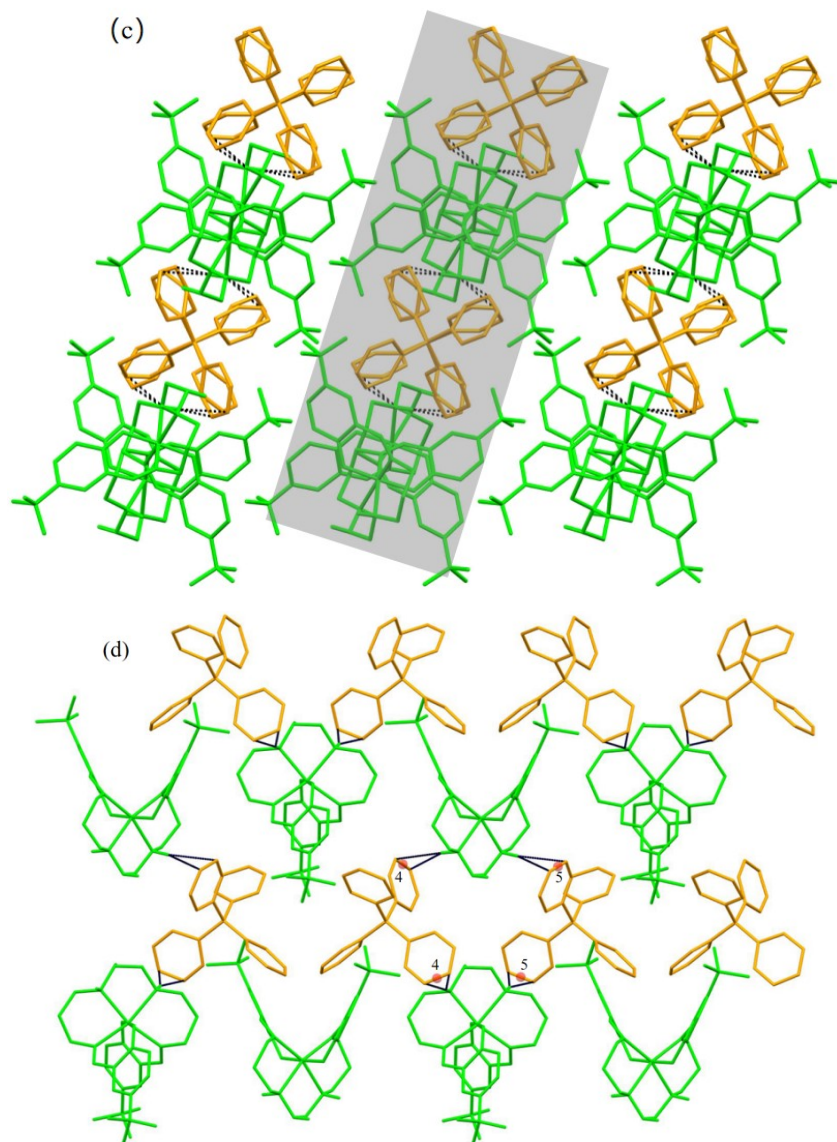

**Figure S3.** (a) Crystal packing of **2** at 110 K along the *b*-axis. (b) The details of the sublattice in gray at 110 K along the *c*-axis (Mn1: green; Mn2: blue; BPh<sub>4</sub>: orange). (c) Crystal packing of **2** at 298 K along the *b*-axis. (d) The details of the sublattice in gray at 298 K along the *c*-axis, showing the N-H... $\pi$  (black dotted line) hydrogen bonds.

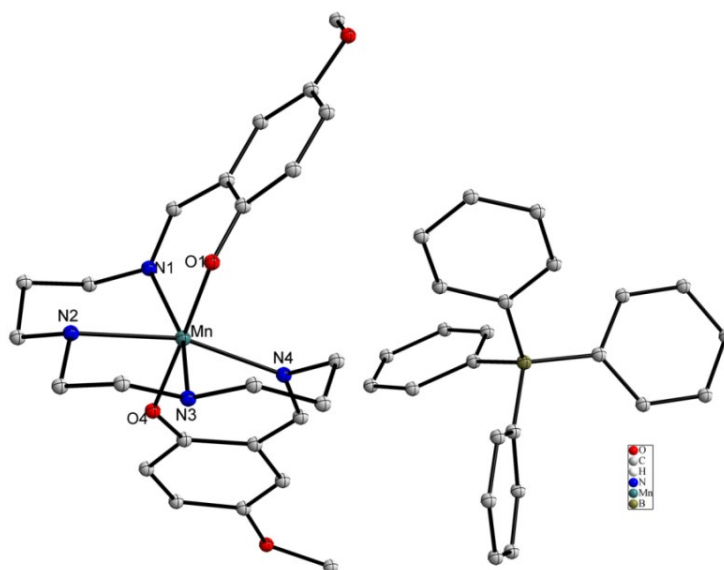

**Figure S4.** Asymmetric unit of complex **3**, measured at 100 K.



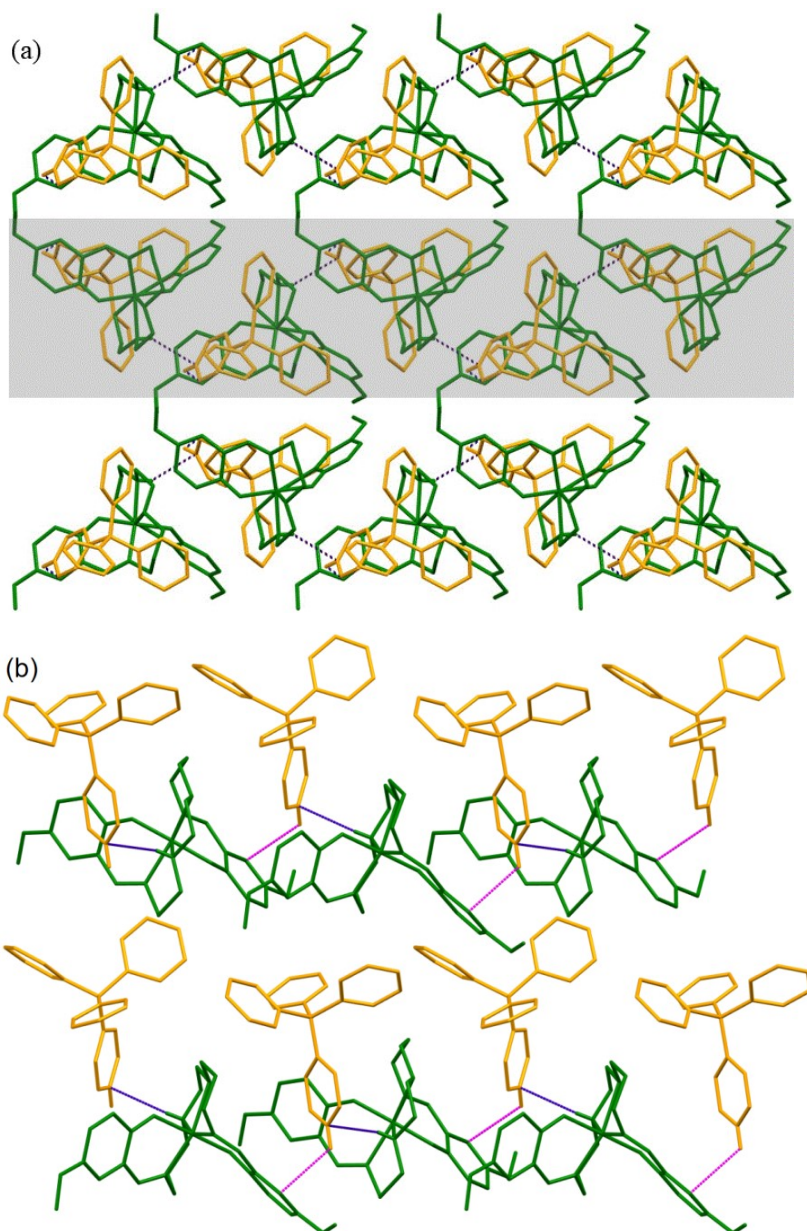

**Figure S5.** (a) Crystal packing of **3** at 100 K along the *c*-axis. (b) The details of the sublattice (gray), showing the N–H $\cdots$  $\pi$  hydrogen bonds (blue dotted line) and C–H $\cdots$  $\pi$  interactions (magenta dotted line).

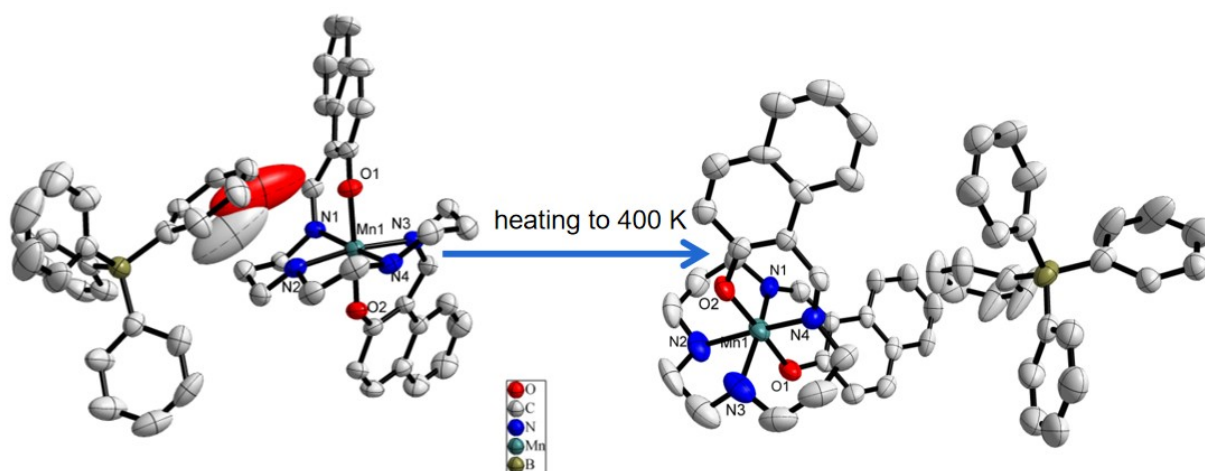

**Figure S6.** Asymmetric unit of complex **4**, measured at 120 K and 298 K, the hydrogen atoms have been omitted for clarity.

Ellipsoids at 50% probability.

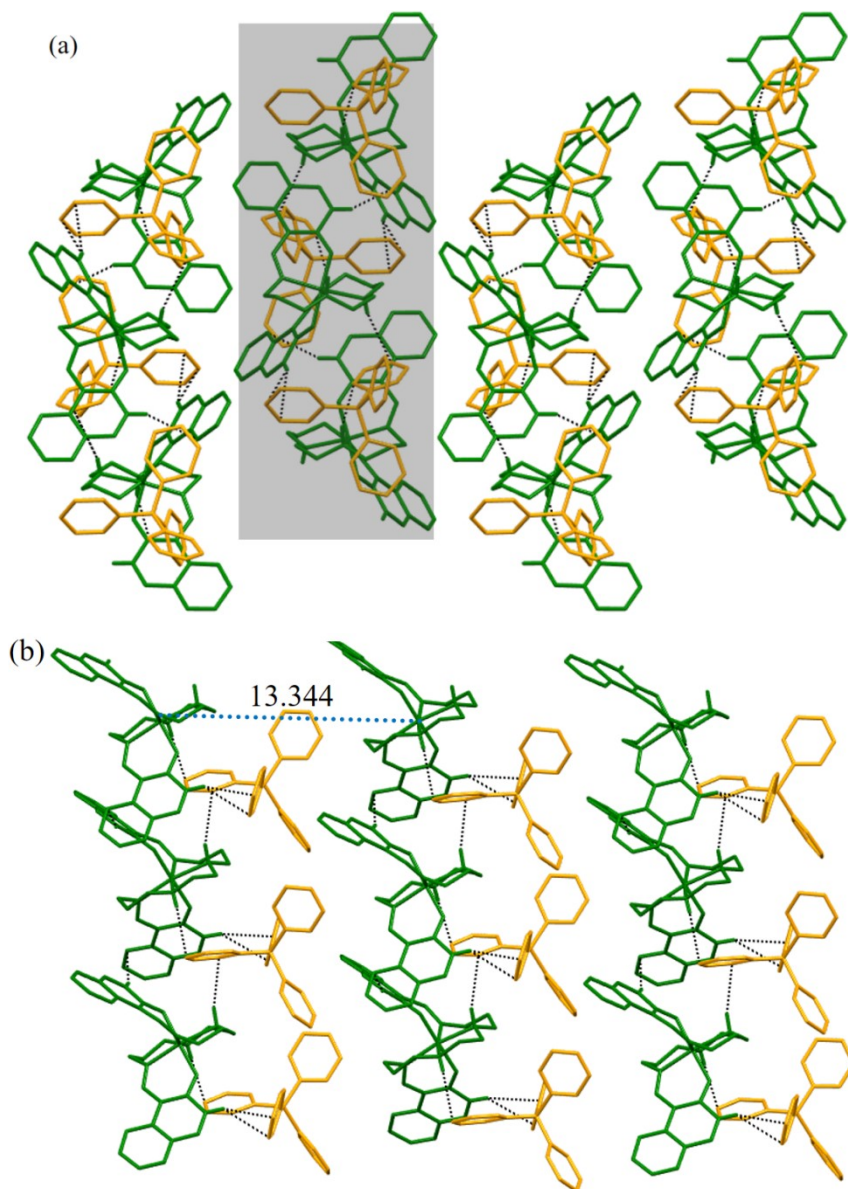

**Figure S7.** (a) Crystal packing of **4b** at 298 K along the *a*-axis, showing the N-H... $\pi$ , C-H... $\pi$  interactions when losing solvent molecules. (b) The details of the gray part in crystal packing of **4b** at 298 K along the *b*-axis, showing the N-H... $\pi$ , C-H... $\pi$  interactions. The Mn...Mn distance (13.344 Å) is indicated by a blue dotted line.

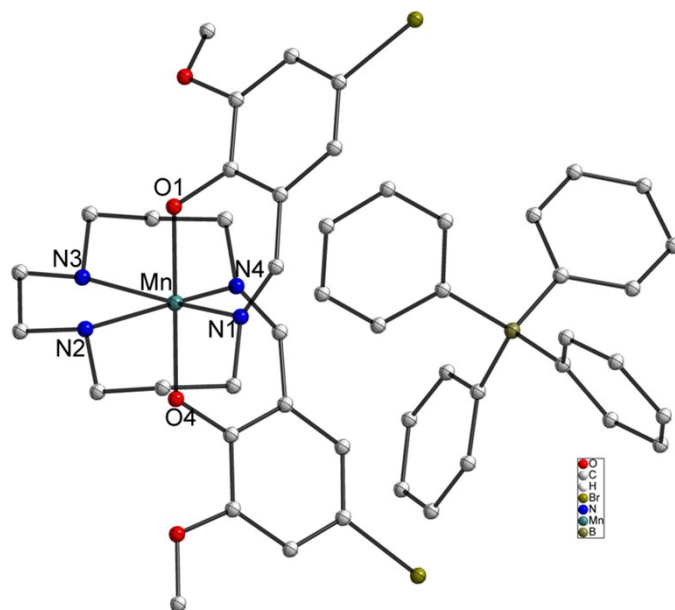

**Figure S8.** Asymmetric unit of complex **5**, measured at 100 K.

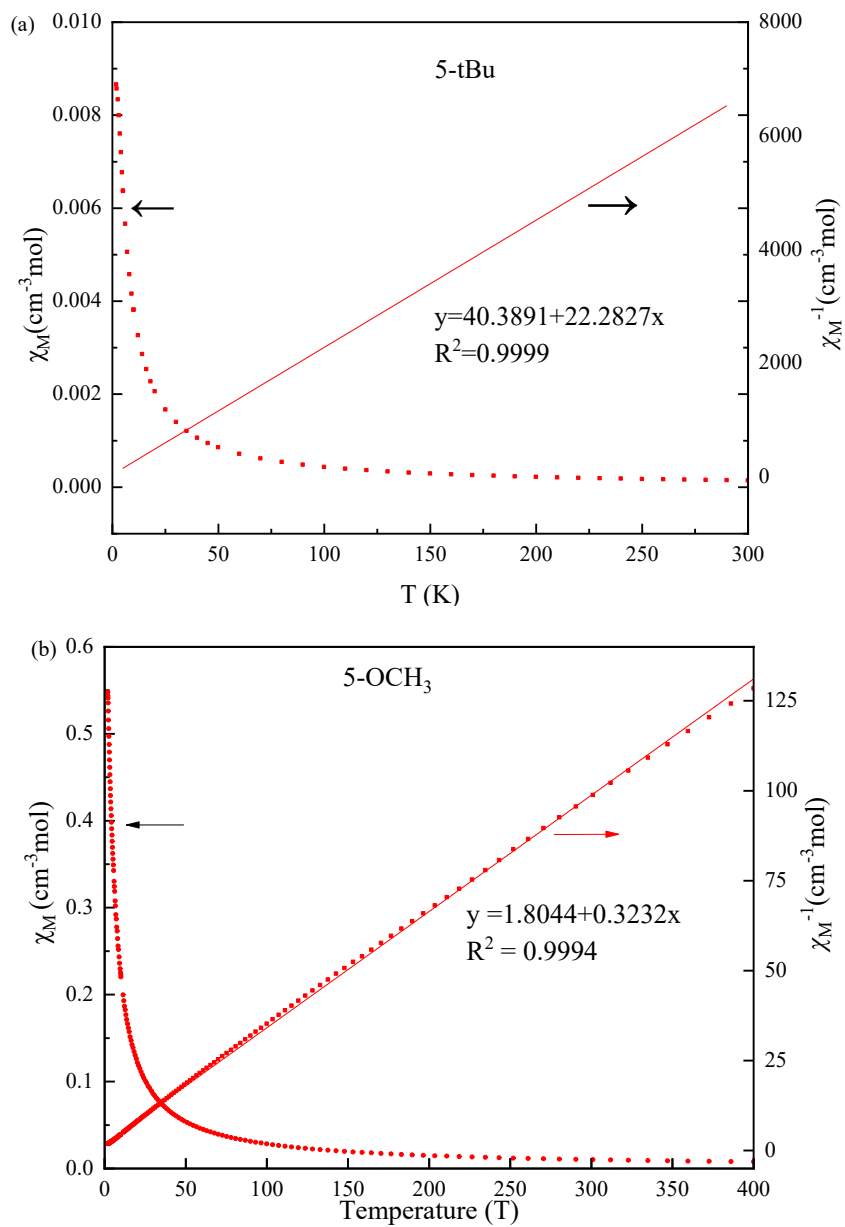

**Figure S9.** Thermal dependence of the  $\chi_M T$ , Insets: thermal dependence of  $1/\chi_M$  (red circles) and best fit to the Curie-Weiss expression (solid red line).



|                                                  |                                                                              |                                                                              |                                                                                  |                                                                              |                                                                              |                                                                              |                                                                                           |                                                                                  |                                                                              |                                                                              |                                                                              |
|--------------------------------------------------|------------------------------------------------------------------------------|------------------------------------------------------------------------------|----------------------------------------------------------------------------------|------------------------------------------------------------------------------|------------------------------------------------------------------------------|------------------------------------------------------------------------------|-------------------------------------------------------------------------------------------|----------------------------------------------------------------------------------|------------------------------------------------------------------------------|------------------------------------------------------------------------------|------------------------------------------------------------------------------|
| 2 $\theta$ range for data collection/ $^{\circ}$ | 4.508 to 45.972                                                              | 4.486 to 40.776                                                              | 4.21 to 56.314                                                                   | 4.168 to 50.064                                                              | 5.018 to 50.054                                                              | 5.024 to 50.052                                                              | 4.554 to 50.056                                                                           | 4.486 to 50.054                                                                  | 4.846 to 47.064                                                              | 4.72 to 50.06                                                                | 4.67 to 50.046                                                               |
| Index ranges                                     | -13 $\leq$ h $\leq$ 15,<br>-16 $\leq$ k $\leq$ 16,<br>-24 $\leq$ l $\leq$ 23 | -13 $\leq$ h $\leq$ 13,<br>-14 $\leq$ k $\leq$ 14,<br>-22 $\leq$ l $\leq$ 21 | -17 $\leq$ h $\leq$ 20, -17<br>$\leq$ k $\leq$ 20, -30 $\leq$ l $\leq$ 22,<br>29 | -27 $\leq$ h $\leq$ 29,<br>-22 $\leq$ k $\leq$ 22,<br>-27 $\leq$ l $\leq$ 23 | -15 $\leq$ h $\leq$ 18,<br>-24 $\leq$ k $\leq$ 13,<br>-16 $\leq$ l $\leq$ 14 | -17 $\leq$ h $\leq$ 18,<br>-24 $\leq$ k $\leq$ 24,<br>-17 $\leq$ l $\leq$ 17 | -10 $\leq$ h $\leq$ 10, -17<br>$\leq$ k $\leq$ 17, -22 $\leq$ l $\leq$ k $\leq$ 18,<br>16 | -10 $\leq$ h $\leq$ 10, -18<br>-22 $\leq$ l $\leq$ -22 $\leq$ k $\leq$ 22,<br>17 | -16 $\leq$ h $\leq$ 17,<br>-29 $\leq$ k $\leq$ 27,<br>-18 $\leq$ l $\leq$ 18 | -12 $\leq$ h $\leq$ 17,<br>-29 $\leq$ k $\leq$ 28,<br>-16 $\leq$ l $\leq$ 16 | -17 $\leq$ h $\leq$ 14,<br>-29 $\leq$ k $\leq$ 28,<br>-17 $\leq$ l $\leq$ 17 |
| Reflections collected                            | 12663                                                                        | 11715                                                                        | 40032                                                                            | 31519                                                                        | 7576                                                                         | 14072                                                                        | 14776                                                                                     | 15521                                                                            | 23439                                                                        | 6728                                                                         | 15067                                                                        |
| Independent reflections                          | 11873 [R <sub>int</sub> = 0.0534, R <sub>sigma</sub> = 0.1151]               | 7984 [R <sub>int</sub> = 0.0359, R <sub>sigma</sub> = 0.0993]                | 23931 [R <sub>int</sub> = 0.0727, R <sub>sigma</sub> = 0.1313]                   | 9102 [R <sub>int</sub> = 0.0681, R <sub>sigma</sub> = 0.0683]                | 7576 [R <sub>int</sub> = 0.0346, R <sub>sigma</sub> = 0.0824]                | 7450 [R <sub>int</sub> = 0.0295, R <sub>sigma</sub> = 0.0415]                | 7859 [R <sub>int</sub> = 0.0294, R <sub>sigma</sub> = 0.0484]                             | 8253 [R <sub>int</sub> = 0.0334, R <sub>sigma</sub> = 0.0644]                    | 6657 [R <sub>int</sub> = 0.0753, R <sub>sigma</sub> = 0.0816]                | 7618 [R <sub>int</sub> = 0.0910, R <sub>sigma</sub> = 0.1672]                | 6892 [R <sub>int</sub> = 0.0369, R <sub>sigma</sub> = 0.0713]                |
| Data/restraint s/parameters                      | 11873/0/994                                                                  | 7984/0/1003                                                                  | 23931/0/537                                                                      | 9102/0/256                                                                   | 7576/2/533                                                                   | 7450/2/533                                                                   | 7859/0/587                                                                                | 8253/0/587                                                                       | 6657/0/567                                                                   | 7618/2/547                                                                   | 6892/2/551                                                                   |
| Goodness-of-fit on F <sup>2</sup>                | 1.048                                                                        | 1.116                                                                        | 1.074                                                                            | 1.777                                                                        | 1.048                                                                        | 1.013                                                                        | 1.051                                                                                     | 1.031                                                                            | 1.025                                                                        | 0.867                                                                        | 1.036                                                                        |
| Final R indexes [I $\geq$ 2 $\sigma$ (I)]        | R <sub>1</sub> = 0.0966, wR <sub>2</sub> = 0.2226                            | R <sub>1</sub> = 0.0692, wR <sub>2</sub> = 0.1485                            | R <sub>1</sub> = 0.1864, wR <sub>2</sub> = 0.4402                                | R <sub>1</sub> = 0.1462, wR <sub>2</sub> = 0.4281                            | R <sub>1</sub> = 0.0536, wR <sub>2</sub> = 0.1357                            | R <sub>1</sub> = 0.0372, wR <sub>2</sub> = 0.0775                            | R <sub>1</sub> = 0.0424, wR <sub>2</sub> = 0.0979                                         | R <sub>1</sub> = 0.0516, wR <sub>2</sub> = 0.1084                                | R <sub>1</sub> = 0.0758, wR <sub>2</sub> = 0.1280                            | R <sub>1</sub> = 0.0634, wR <sub>2</sub> = 0.1300                            | R <sub>1</sub> = 0.0711, wR <sub>2</sub> = 0.1793                            |
| Final R indexes [all data]                       | R <sub>1</sub> = 0.1372, wR <sub>2</sub> = 0.2473                            | R <sub>1</sub> = 0.1224, wR <sub>2</sub> = 0.1661                            | R <sub>1</sub> = 0.2309, wR <sub>2</sub> = 0.4646                                | R <sub>1</sub> = 0.1753, wR <sub>2</sub> = 0.4589                            | R <sub>1</sub> = 0.0645, wR <sub>2</sub> = 0.1448                            | R <sub>1</sub> = 0.0508, wR <sub>2</sub> = 0.0830                            | R <sub>1</sub> = 0.0576, wR <sub>2</sub> = 0.1047                                         | R <sub>1</sub> = 0.0915, wR <sub>2</sub> = 0.1227                                | R <sub>1</sub> = 0.1417, wR <sub>2</sub> = 0.1594                            | R <sub>1</sub> = 0.0975, wR <sub>2</sub> = 0.1435                            | R <sub>1</sub> = 0.1011, wR <sub>2</sub> = 0.2002                            |
| Largest diff. peak/hole / e $\text{\AA}^{-3}$    | 2.35/-1.61                                                                   | 0.52/-0.71                                                                   | 2.14/-1.41                                                                       | 1.67/-0.54                                                                   | 0.56/-0.49                                                                   | 0.14/-0.20                                                                   | 0.32/-0.57                                                                                | 0.24/-0.35                                                                       | 0.31/-0.46                                                                   | 0.85/-0.91                                                                   | 1.14/-0.66                                                                   |

**Table S2.** Selected bond angles for **1-5**.

|           | 5-I-1     |          | 5-tBu-2  |            | 5-OCH <sub>3</sub> -3 |            | naphth-4a |           | naphth-4b  | 5-Br-3-OCH <sub>3</sub> -5 |          |
|-----------|-----------|----------|----------|------------|-----------------------|------------|-----------|-----------|------------|----------------------------|----------|
|           | 110 K     | 298 K    | 100 K    | 298 K      | 100 K                 | 298 K      | 100 K     | 298 K     | 298 K      | 100 K                      | 298 K    |
| O1—Mn1—O2 | 1178.0(5) | 177.1(4) | 177.9(3) | 177.88(18) | 178.5(2)              | 178.75(15) | 173.34(9) | 173.39(8) | 177.43(15) | 178.5(4)                   | 178.2(3) |
| O1—Mn1—N1 | 86.6(5)   | 86.5(4)  | 87.8(2)  | 92.0(2)    | 87.6(2)               | 87.00(13)  | 87.79(11) | 88.70(9)  | 87.73(16)  | 87.6(3)                    | 86.8(3)  |
| O2—Mn1—N1 | 91.6(5)   | 91.3(4)  | 91.7(3)  | 91.6(2)    | 91.5(2)               | 92.52(14)  | 96.13(11) | 95.63(9)  | 94.10(16)  | 92.2(3)                    | 94.6(3)  |





|           |               |               |               |        |        |        |        |        |        |        |        |
|-----------|---------------|---------------|---------------|--------|--------|--------|--------|--------|--------|--------|--------|
| N8—Mn2—N7 | 86.1(5)       | 85.4(5)       | 84.4(3)       |        |        |        |        |        |        |        |        |
| $\Sigma$  | 76.21/55.28   | 74.93/61.79   | 59.65/57.28   | 60.53  | 82.34  | 81.93  | 41.30  | 39.18  | 51.86  | 38.32  | 70.26  |
| $\Theta$  | 267.87/180.72 | 262.49/201.83 | 218.44/218.39 | 226.18 | 290.75 | 282.16 | 114.37 | 113.55 | 154.65 | 226.70 | 231.70 |

**Table S3.** Hydrogen bond distances for complexes **1-5** (Å, °).

|                                 | 112 K            |       |       |                  | 296 K             |       |       |         |
|---------------------------------|------------------|-------|-------|------------------|-------------------|-------|-------|---------|
|                                 | <b>D-H...A</b>   | D...A | H...A | D-H...A          | D-H...A           | D-A   | H...A | D-H...A |
| <b>5-I-1</b>                    | N2-H11...I1      | 3.820 | 2.94  | 148              | N2-H11...I1       | 3.848 | 2.98  | 148     |
|                                 | N7-H42... $\pi$  | 3.396 | 2.451 | 157              | N6-H37... $\pi$   | 3.412 | 2.476 | 159     |
|                                 |                  |       |       |                  |                   |       |       |         |
| <b>5-tBu-2</b>                  | 110 K            |       |       |                  | 297 K             |       |       |         |
|                                 | <b>D-H...A</b>   | D-A   | H...A | D-H...A          | D-H...A           | D-A   | H...A | D-H...A |
|                                 | N2-H2... $\pi$ 1 | 3.515 | 2.515 | 177              | N2-H11... $\pi$ 4 | 3.469 | 2.500 | 170     |
|                                 | N7-H7... $\pi$ 2 | 3.483 | 2.495 | 169              | N2-H11... $\pi$ 5 | 3.482 | 2.501 | 178     |
| N6-H6... $\pi$ 3                | 3.506            | 2.508 | 175   |                  |                   |       |       |         |
| <b>5-OCH<sub>3</sub>-3</b>      | 104 K            |       |       |                  | 298 K             |       |       |         |
|                                 | <b>D-H...A</b>   | D-A   | H...A | D-H...A          | D-H...A           | D-A   | H...A | D-H...A |
|                                 | N2-H14... $\pi$  | 3.411 | 2.776 | 147              | N2-H14... $\pi$   | 3.445 | 2.688 | 159     |
| C40-H45... $\pi$                | 3.473            | 2.855 | 123   | C40-H45... $\pi$ | 3.500             | 2.847 | 128   |         |
| <b>naphth-4a</b>                | 120 K            |       |       |                  | 295 K             |       |       |         |
|                                 | <b>D-H...A</b>   | D-A   | H...A | D-H...A          | D-H...A           | D-A   | H...A | D-H...A |
|                                 | N2-H11... $\pi$  | 3.397 | 2.509 | 171              | N2-H14... $\pi$   | 3.415 | 2.524 | 170     |
|                                 | N3-H11... $\pi$  | 3.349 | 2.448 | 170              | C2-H1...O3        | 3.389 | 2.526 | 154     |
|                                 | C-H... $\pi$     | 3.258 | 2.316 | 161              | C17-H21...O3      | 3.551 | 2.680 | 150     |
| $\pi$ ... $\pi$                 | 3.21             |       |       | $\pi$ ... $\pi$  | 3.277             |       |       |         |
| <b>naphth-4b</b>                |                  |       |       |                  | 293 K             |       |       |         |
|                                 |                  |       |       |                  | N2-H14... $\pi$   | 3.714 | 2.825 | 156     |
|                                 |                  |       |       |                  | N3-H19... $\pi$   | 3.556 | 2.821 | 166     |
|                                 |                  |       |       | C32-H32... $\pi$ | 3.523             | 2.747 | 141   |         |
| <b>5-Br-3-OCH<sub>3</sub>-5</b> | 100 K            |       |       |                  | 298 K             |       |       |         |
|                                 | <b>D-H...A</b>   | D-A   | H...A | D-H...A          | D-H...A           | D-A   | H...A | D-H...A |
|                                 | N3-H3... $\pi$   | 3.776 | 2.780 | 173              | N3-H15... $\pi$   | 3.414 | 2.655 | 142     |

|  |              |       |       |     |              |       |       |     |
|--|--------------|-------|-------|-----|--------------|-------|-------|-----|
|  | C41-H41...O4 | 3.283 | 2.668 | 123 |              |       |       |     |
|  | C3-H3b...Br2 | 3.757 | 2.876 | 150 | C3-H3b...Br2 | 3.809 | 2.893 | 160 |
